# Supplementary material
Source: Research Square preprint supplement (doi:10.21203/rs.3.rs-8783794/v1)
Supplement: Supplementary file 1 [file 7ff6590e6173d5dc90c245bf.docx]

Balancing loss of physical function in older adults’ everyday lives with multimorbidity – a qualitative study

Interview guide translated from Danish

| **Introduction** | | | | | |
| --- | --- | --- | --- | --- | --- |
| Briefing: Presentation of the interviewer | | Introduce myself | | Who am I? Why am I conducting this study? | |
| Purpose of the interview | | The purpose of the interview is to gather empirical data to shed light on the area of concern. | | The purpose is to learn about your experiences of managing less in everyday life due to physical decline and how you cope with exercise. | |
| Interview Framework | | Time frame | | The interview will last approximately 30–60 minutes. | |
| Interview Framework | | The interview is audio recorded | | The interview will be audio recorded to support memory and later transcribed and analysed. | |
| Use of Interview | |  | | The interview will be analysed. You will remain anonymous. The interview will be part of two research projects: 1) collaboration between hospital, municipality, and GP regarding training for multimorbid patients, and 2) cross-sectoral support for physical activity in older adults with multimorbidity and physical decline. | |
| Rights | | Anonymisation | | Participation is voluntary. You can withdraw consent or skip questions. If you have any doubts or lack clarity, feel free to ask. | |
| Collect consent | | Signature on consent form | | Signature on consent form | |
| **Purpose: To explore how older multimorbid adults with high disease burden and functional decline experience and manage everyday life** | | | | | |
|  | **Theme** | | **Question** | | **Supplementary Questions** |
|  | **Opening Question** | | 1) Describe your experience of everyday life in your own words | | How are you feeling right now?  What is difficult in everyday life? |
| **Function and Decline** | **The patient's experience of their own bodily function and physical functional decline.** | | 2) How would you describe your body and any changes that have occurred?  3) What losses or changes do you experience in terms of bodily functioning? | | Do you experience any changes, weaknesses or limitations in your daily life? *Physically*, *mentally*, or *socially?* |
| **PADL** (personal activities): 4) How do you manage daily tasks like bathing, getting dressed, using the bathroom, and eating? | | Do you find it difficult to get to the toilet, bedroom, kitchen? Getting dressed? Using the toilet? Getting up from a chair? Getting out of bed? |
| **IADL** (instrumental activities):  5) Do you feel you have become weaker/worse - and how do you feel about that?  6) What challenges do you face when leaving the house? | | Tell me about your thoughts before using public transportations, going to the swimming pool, shopping, training/day centre, visiting family/friends, going to the theatre/cinema? |
| **Personal Factors** | **Patients’ experiences of coping with functional decline, activity limitations, and participation restrictions in everyday life.** | | 7) What is the first thing you think of that positively influences your future everyday life with functional decline? | | How do you think it can be part of your current everyday life? |
| 8) If your friends asked how, you manage your physical decline, what would you tell them? | | How can you maintain your current physical and social everyday life?  What are you afraid of you will not be able to manage in the future? |
| **External Factors** |  | | 9) How do you think your surroundings can support you in maintaining your social, mental, and physical resources? | | Family, friends? Healthcare professionals: nurses, physicians, municipality, etc. |
|  | | 10) If you could choose, how and where would you prefer healthcare professionals to support you going forward? | | Why do you think that’s good? What made you feel safe/unsafe? Are you worried? Nervous? |
| **Individual Wishes, Needs, and Goals** | **Clarification of what is important to the patient to manage functional decline in everyday life.** | | 11) If you could wish freely, what would your future everyday life with functional decline and training look like? | | How do you think healthcare professionals best support your wishes? |
| 12) What needs do you feel are important for you to thrive in everyday life with reduced function? | | How do you think healthcare professionals best support these needs to help you manage functional decline? |
| 13) What goals do you have for your future everyday life with functional decline? | | What support do you think healthcare professionals around you can provide to help you reach this goal? |
| **Barriers to Physical/Social Activity** | **Clarification of whether medication and its side effects affect how physically active or socially engaged the patient is in everyday life.** | | 14) Do you feel your regular medication and its side effects affect your physical and/or social activities in everyday life? | | What side effects? Significant weight gain/loss, sweating, fatigue, dizziness |
| **The patient's experience of being heard and receiving help needed to be physically and socially active in everyday life.** | | 15) How do you feel about needing help from the municipality, and what impact does it have on your physical or social activity? | | Describe the barriers you experience that hinder your physical or social activity: right help, timing of help |
| 16) How do you feel about needing help at a specific time to get out the door for scheduled activity/training? 17) How do you experience being heard and getting the help you need? | | How do you feel about needing help at a specific time so you can get out the door for scheduled activity/training? – help with putting on support stockings |
| **(XXX) Intervention (Before, During, After)** | **The patient's experience of social, mental, and physical functional level Have the patients succeeded in integrating what they have learned into their everyday life.** | | **Before:**  18) What was your experience of limitations in specific activities and movements before participating in the intervention and patient education? | | What did you notice about your function before starting to exercise? |
| **During:**  19) What was your experience of limitations during the intervention?  20) What did you think during the intervention? | | What was particularly good/bad? Did you feel trust/distrust in its effect? Suitable/unsuitable exercising/patient education? |
| **After:**  21) How do you experience your functional level after exercising/patient education?  22) If you could choose freely, where, when, and how would you prefer to train? | | Do you notice a change? What is your functional level now? What suits you the best? |
|  | **Closing remarks** | | 23) Is there anything you haven’t said that you think is important? | | Is there anything important I have not asked about? |
